# Supplementary material
Source: publisher site journal article supplement (https://static.cambridge.org/content/id/urn:cambridge.org:id:article:S2040174420000823/resource/name/S2040174420000823supp001.zip)
Supplement: Supplementary file 1 [file S2040174420000823supp001.zip]

Archive with 10 entries (10 files):
- S2040174420000823supp001.docx
- S2040174420000823supp002.docx
- S2040174420000823supp003.docx
- S2040174420000823supp004.docx
- S2040174420000823supp005.xlsx
- S2040174420000823supp006.pdf
- S2040174420000823supp007.docx
- S2040174420000823supp008.docx
- S2040174420000823supp009.docx
- S2040174420000823supp010.docx
