# Supplementary material
Source: publisher site journal article supplement (https://static.cambridge.org/content/id/urn:cambridge.org:id:article:S2040174420000823/resource/name/S2040174420000823supp001.zip)
Supplement: Supplementary file 1 [file S2040174420000823supp001.zip › S2040174420000823supp001.docx]

| ***Supplementary Table 5. Study design and maternal sucrose intervention summary*** | | | | | | | | |
| --- | --- | --- | --- | --- | --- | --- | --- | --- |
| ***Citation*** | ***Species*** | ***Strain*** | ***n***  ***(sucrose dams)*** | ***Sucrose concentration***  ***(% w/v)*** | ***Administration of sucrose solution*** | ***Duration of maternal exposure*** | | |
| ***PG*** | ***G*** | ***L*** |
| Ozkan 2019 | Rat | NR | 7  7 | 10  20 | Added to drinking water *ad libitum*  (5 days per week) | - | Y  Y | Y  Y |
| Kisioglu 2018 | Rat | Sprague Dawley | 5-7 | 20 | added to drinking water *ad libitum* | 84 | Y | Y |
| Zhang 2018 | Rat | Sprague Dawley | 6 | 20 | added to drinking water *ad libitum* | - | Y | - |
| Feng 2017 | Rat | Sprague Dawley | 20 | 20 | added to drinking water *ad libitum* | - | Y | - |
| Gu 2017 | Rat | Sprague Dawley | 10 | 20 | added to drinking water *ad libitum* | - | Y | - |
| He 2017 | Rat | Sprague Dawley | 11 | 20 | added to drinking water *ad libitum* | - | Y | - |
| Toop 2017 | Rat | Wistar | 19 | 10 | added to drinking water *ad libitum*  (cross fostering model) | 28 | Y | Y |
| Yuruk 2017 | Rat | Sprague Dawley | 5-7 | 20 | added to drinking water *ad libitum* | 84 | Y | Y |
| Wu 2016 | Rat | Sprague Dawley | NR | 20 | added to drinking water *ad libitum* | - | Y | - |
| Kendig 2015 | Rat | Wistar | 11 | 10 | in addition to chow and water *ad libitum* | 28 | Y | - |
| Toop 2015 | Rat | Wistar | 19 | 10 | added to drinking water *ad libitum* | 28 | Y | Y |
| Kuang 2014 | Rat | Sprague Dawley | 10 | 20 | added to drinking water *ad libitum* | - | Y | - |
| Wu 2014 | Rat | Sprague Dawley | 8 | 20 | added to drinking water *ad libitum* | - | Y | - |
| Borcarsly 2012 | Rat | Sprague Dawley | 5 | 10 | in addition to chow and water *ad libitum*  (cross-fostering model) | - | GD5-21 | - |
| Wu 2011 | Rat | Sprague Dawley | 8 | 20 | added to drinking water *ad libitum* | - | Y | - |

**Abbreviations:** G – gestation; GD – gestational days; ml – millilitres; M; Molar; *n* – number of animals; NR – not reported; L – lactation; PG – pre-gestation (in days); PND – post natal days; w/v – weight per volume
