# Supplementary material
Source: publisher site journal article supplement (https://static.cambridge.org/content/id/urn:cambridge.org:id:article:S2040174420000823/resource/name/S2040174420000823supp001.zip)
Supplement: Supplementary file 1 [file S2040174420000823supp001.zip › S2040174420000823supp002.docx]

**Figure 1.** **Adherence of the ARRIVE Guidelines Checklist per item**. Percentages (0-100%) refer to the percentage of included studies reporting at each level for each item. Items are described as ‘fully reported’, partially reported or non-reported. For items with associated sub-items fully reported means that all sub-items were reported, partially reported that not all sub-items are fully reported, and not reported that none of the sub-items was reported.
