# Supplementary material
Source: publisher site journal article supplement (https://static.cambridge.org/content/id/urn:cambridge.org:id:article:S2040174420000823/resource/name/S2040174420000823supp001.zip)
Supplement: Supplementary file 1 [file S2040174420000823supp001.zip › S2040174420000823supp003.docx]

| ***Study ID*** | ***Chow Supplier*** | ***Macronutrient Composition****  ***(% of total energy)*** |
| --- | --- | --- |
| Ozkan 2019 | Not reported | Not reported |
| Kisioglu 2018 | Nukleon Laboratory Systems | 13% fat (corn oil)  60% carbohydrate (starch and dextrose)  24% protein (casein)  Energy content 4.2 kcal/ g feed |
| Zhang 2018 | Slaccas Laboratory Animal Centre, Shanghai China (Catalog number: M01) | 13.8% fat  60.5% carbohydrate  25.7% protein |
| Feng 2017 | Slaccas Laboratory Animal Centre, Shanghai China | 4.0% fat  39.1% carbohydrate  19.3% protein  0.6% sodium chloride  1% calcium  0.70% phosphate  0.68% potassium |
| Gu 2017 | Not reported | Not reported |
| He 2017 | Slaccas Laboratory Animal Centre, Shanghai China | 4.0% fat  39.1% carbohydrate  19.3% protein  0.6% sodium chloride  1% calcium  0.70% phosphate  0.68% potassium |
| Toop 2017 | Speciality Feeds, Glen Forrest Western Australia, Australia | 4% fat  60% carbohydrate  20% protein  Energy content 14 kJ /g |
| Yuruk 2017 | Nukleon Laboratory Systems Inc., Ankara, Turkey | 13% fat (corn oil)  60% carbohydrate (corn starch and dextrose)  24% protein (casein)  Energy content 4.2 kcal/g (gross energy) |
| Wu 2017 | Not reported | Not reported |
| Kendig 2015 | Speciality Feeds, Glen Forrest Western Australia, Australia | 4% fat  60% carbohydrate  20% protein  Energy content 14.2 kJ/g |
| Toop 2015 | Speciality Feeds, Glen Forrest Western Australia, Australia | 4% fat  60% carbohydrate  20% protein  Energy content 14 kJ /g |
| Kuang 2014 | Slaccas Laboratory Animal Centre, Shanghai China | 4.0% fat  39.1% carbohydrate  19.3% protein  0.6% sodium chloride  1% calcium  0.70% phosphate  0.68% potassium |
| Wu 2014 | Not reported | Not reported |
| Borcarsely 2012 | Purina rodent chow | 13.5% fat  58% carbohydrate  28.5% protein  Energy content 3.02 kcal/g |
| Wu 2011 | Not reported | Not reported |

* As reported verbatim from publication
