# Supplementary material
Source: publisher site journal article supplement (https://static.cambridge.org/content/id/urn:cambridge.org:id:article:S2040174420000823/resource/name/S2040174420000823supp001.zip)
Supplement: Supplementary file 1 [file S2040174420000823supp001.zip › S2040174420000823supp004.docx]

(1) PubMed database was searched using the following combination of Medical Subject Headings (MeSH) terms and relevant free terms in title and/or abstract [tiab]. In addition, an adaptation from the SYRCLE PubMed animal filter1 designed to maximise retrieval of all animal experiments in rodent models was used.

(Epigenesis, Genetic[Mesh:noexp] OR Embryonic and Fetal Development[Mesh:noexp]) OR Epigenomics[Mesh] OR Embryonic Development[Mesh:noexp] OR Fetal Development[Mesh:noexp] OR Fetal Weight[Mesh] OR Fetal Nutrition Disorders[Mesh] OR Gene-Environment Interaction[Mesh] OR Phenotype[Mesh:noexp] OR "Foetal development"[Title/Abstract] OR "Fetal development"[Title/Abstract] OR "Foetal programming"[Title/Abstract] OR "Fetal programming"[Title/Abstract] OR Epigenetic[Title/Abstract] OR Offspring[Title/Abstract] OR "Phenotyp* programming"[Title/Abstract] OR "Phenotyp* development"[Title/Abstract] OR "Developmental programming"[Title/Abstract] OR "Epigenetic inheritance"[Title/Abstract]) AND (Nutritive Sweeteners[Mesh:noexp] OR Dietary Sugars[Mesh:noexp] OR Dietary Sucrose[Mesh] OR Sucrose[Mesh:noexp] OR Sugars[Mesh:noexp] OR Fructose[Mesh] OR Sweetening Agents[Mesh] OR "sweet* diet*"[Title/Abstract] OR "Nutritive sweeten*"[Title/Abstract] OR "High sugar diet*"[Title/Abstract] OR "HSD"[Title/Abstract] OR "added sugar*"[Title/Abstract] OR sucrose[Title/Abstract] OR fructose[Title/Abstract] OR sugar*[Title/Abstract]) AND ("Mothers"[Mesh] OR "Maternal Exposure"[Mesh] OR Maternal Nutritional Physiological Phenomena[Mesh] OR "Prenatal Exposure Delayed Effects"[Mesh] OR "Pregnancy"[Mesh:noexp] OR "Prenatal Nutritional Physiological Phenomena"[Mesh] OR Lactation[Mesh:noexp] OR Weaning[Mesh] OR Maternal[Title/Abstract] OR Gestat*[Title/Abstract] OR "in-utero"[Title/Abstract] OR "inutero"[Title/Abstract] OR pregnan*[Title/Abstract] OR offspring*[Title/Abstract] OR prenatal[Title/Abstract] OR perinatal[Title/Abstract] OR lactat*[Title/Abstract] OR Mother*[Title/Abstract] OR embryo*[Title/Abstract] OR intrauterine[Title/Abstract] OR "pre-gestation"[Title/Abstract] OR "early exposure"[Title/Abstract] OR "early life exposure"[Title/Abstract] OR wean*[Title/Abstract])

(In addition to the adapted animal filter1)

AND (“animal experimentation”[MeSH Terms] OR “models, animal”[MeSH Terms] OR

“invertebrates”[MeSH Terms] OR “Animals”[Mesh:noexp] OR “animal

population groups”[MeSH Terms] OR “rodentia”[MeSH Terms]

OR animals[tiab] OR animal[tiab] OR rodentia[Tiab] OR rodent[Tiab] OR rodents[Tiab] OR mice[Tiab] OR mus[Tiab] OR mouse[Tiab] OR murine[Tiab] OR woodmouse[tiab] OR rats[Tiab] OR rat[Tiab] OR murinae[Tiab] OR muridae[Tiab])

(2) Embase was searched using the following combination of Subject Headings and relevant keywords in addition to an adapted SYRCLE Embase animal filter2.

(exp maternal nutrition/ OR maternal exposure/ OR exp prenatal exposure/ OR pregnancy/ OR progeny/ OR exp perinatal period/ OR lactation/ OR mother/ OR gestation period/ OR Maternal.tw. OR Gestat*.tw. OR In utero.tw. OR Pregnan*.tw. OR Offspring.tw. OR Prenatal.tw. OR Perinatal.tw. OR Lactat*.tw. OR Mother*.tw. OR Embryo*.tw. OR Intrauterine.tw. OR Pre-gestat*.tw. OR (Early adj 2 exposure).tw. OR Wean*.tw.) AND (high-sucrose diet/ OR nutritive sweetener/ OR sugar intake/ OR sugar/ OR sucrose/ OR fructose OR Sweet* diet*.tw. OR Nutritive sweeten*.tw. OR High sugar diet*.tw. OR HSD.tw OR Added sugar*.tw. OR Sucrose.tw OR fructose.tw. OR Sugar*.tw) AND (Exp fetus development/ OR epigenetics/ OR fetus growth/ OR exp prenatal growth/ OR ecp ecological genetics/ OR exp perinatal development/ OR exp prenatal development/ OR development/ OR phenotypic plasticity/ OR F$etal development.tw. OR F$etal programming.tw. OR Epigenetic.tw. OR Offspring.tw. OR Phenotyp* programming.tw. OR Phenotyp* development.tw. OR Developmental programming.tw. OR Epigenetic inheritance.tw.)

(In addition to the adapted animal filter2)

AND (exp animal experiment/ or exp animal model/ or exp experimental animal/ or exp transgenic animal/ or exp male animal/ or exp female animal/ or exp juvenile animal/ OR animal/ OR rodentia.tw. OR rodent.tw. OR rodents.tw. OR murinae.tw. OR mouse.tw. OR mice.tw. OR mus.tw. OR musculus.tw. OR murine.tw. OR woodmouse.tw. OR apodemus.tw. OR rat.tw. OR rats.tw. OR rattus.tw. OR norvegicus.tw.)

(3) Scopus and Web of Science will be searched using relevant keywords as seen below:

(maternal OR gestat* OR “In utero” OR “inutero” OR pregnan* OR offspring OR prenatal OR perinatal OR lactat* OR mother* OR embryo* OR intrauterine OR “Pre-gestat*” OR “early exposure” OR “early life exposure” OR wean*) AND (“Sweet* diet*” OR “Nutritive sweeten*” OR “High sugar diet*” OR HSD OR “Added sugar*” OR sucrose OR fructose OR sugar*) AND “Fetal development” OR “Foetal programming” OR epigenetic OR offspring OR “Phenotyp* programming” OR “Phenotyp* development” OR “Developmental programming”) AND (rodentia OR rodent OR rodents OR murinae OR mouse OR mice OR mus OR musculus OR murine OR woodhouse OR apodemus OR rat OR rats OR rattus OR norvegicus OR “animal experiment” OR “animal model” OR “experimental animal” OR “transgenic animal” OR “male animal” OR “female animal” OR “juvenile animal” OR animal)

**References**

1. Hooijmans, C. R., Tillema, A., Leenaars, M., Ritskes-Hoitinga, M. Enhancing search efficiency by means of a search filter for finding all studies on animal experimentation in PubMed. Laboratory Animals, 2010; 44, 170–175. <https://doi.org/10.1258/la.2010.009117>

2. de Vries, R. B. M., Hooijmans, C. R., Tillema, A., Leenaars, M., Ritskes-Hoitinga, M. Letter to the Editor. Laboratory Animals, 2014; 48, 88–88
