# Supplementary material
Source: publisher site journal article supplement (https://static.cambridge.org/content/id/urn:cambridge.org:id:article:S2040174420000823/resource/name/S2040174420000823supp001.zip)
Supplement: Supplementary file 1 [file S2040174420000823supp001.zip › S2040174420000823supp005.xlsx]

## Sheet: Sheet1
		Item	Ozkan 2019	Kisioglu 2018	Zhang 2018	Feng 2017	Gu 2018	He 2017	Toop 2017	Yuruk 2017	Wu 2016	Kendig 2015	Toop 2015	Kuang 2014	Wu 2014	Borcarsly 2012	Wu 2011		Fully Reported	Partially Reported	Not Reported	Not Applicable
	Title	1	FR	FR	FR	FR	FR	FR	FR	FR	FR	FR	FR	FR	FR	FR	FR		100	0	0	0
	Abstract	2	PR	FR	FR	PR	FR	PR	FR	FR	PR	PR	FR	FR	PR	PR	PR		46.6667	53.3333	0	0
Introduction	Background	3	PR	FR	PR	PR	PR	PR	FR	PR	FR	FR	FR	PR	PR	FR	FR		46.6667	53.3333	0	0
	Objectives	4	PR	PR	PR	FR	FR	PR	FR	FR	FR	FR	FR	FR	FR	FR	FR		73.3333	26.6667	0	0
	Ethical Statement	5	FR	FR	FR	FR	FR	FR	FR	FR	FR	FR	FR	FR	FR	FR	FR		100	0	0	0
Methods	Study Design	6	PR	PR	PR	PR	PR	PR	PR	PR	PR	PR	PR	PR	PR	PR	PR		0	100	0	0
	Experimental Procedures	7	PR	PR	PR	PR	PR	PR	FR	PR	PR	FR	PR	FR	PR	FR	PR		26.6667	73.3333	0	0
	Experimental Animals	8	PR	PR	PR	PR	PR	PR	PR	FR	FR	FR	FR	PR	PR	PR	PR		26.6667	73.3333	0	0
	Housing and Husbandry	9	PR	PR	PR	PR	PR	PR	PR	PR	PR	PR	PR	PR	PR	PR	PR		0	100	0	0
	Sample Size	10	PR	FR	PR	PR	NR	PR	PR	FR	PR	PR	PR	PR	PR	PR	NR		13.3333	73.3333	13.3333	0
	Allocating animals to experimental groups	11	NR	PR	NR	NR	NR	NR	NR	NR	NR	PR	NR	NR	NR	NR	NR		0	13.3333	86.6667	0
	Experimental outcomes	12	FR	FR	FR	FR	FR	FR	FR	FR	FR	FR	FR	FR	FR	FR	FR		100	0	0	0
	Statistical methods	13	PR	FR	NR	PR	PR	FR	FR	PR	PR	FR	FR	PR	PR	PR	PR		33.3333	60	6.66667	0
Results	Baseline data	14	PR	PR	PR	FR	PR	PR	PR	FR	FR	FR	FR	PR	PR	PR	NR		33.3333	60	6.66667	0
	Numbers analysed	15	FR	FR	FR	FR	NR	FR	FR	FR	FR	FR	FR	FR	FR	FR	NR		86.6667	0	13.3333	0
	Outcomes and estimation	16	FR	FR	FR	FR	FR	FR	FR	FR	FR	FR	FR	FR	FR	FR	FR		100	0	0	0
	Adverse events	17	N/A	FR	N/A	N/A	N/A	N/A	N/A	FR	N/A	FR	N/A	N/A	N/A	N/A	N/A		20	0	0	80
Discusssion	Interpretation/ scientific implications	18	PR	PR	PR	PR	PR	PR	PR	PR	PR	PR	PR	PR	PR	PR	PR		0	100	0	0
	Generalisability/ translation	19	NR	NR	FR	NR	NR	NR	FR	FR	NR	FR	FR	FR	NR	FR	FR		53.3333	0	46.6667	0
	Funding	20	FR	FR	FR	FR	FR	FR	FR	FR	FR	FR	FR	FR	FR	FR	FR		100	0	0	0
			Abbreviations FR Fully Reported; PR Partially Reported; R Reported; NR Not Reported
			Categorised FR if all items or sub-items from reporting evaluation descriptors reported
			Categorised PR if only some sub-items from reporting evaluation descriptors reported e.g. 4/6 sub-items for Item 8
			Categorised R if sub-items reported
			Categorised NR if items or all sub-items not reported

## Sheet: Sheet2
		Item	Ozkan 2019	Kisioglu 2018	Zhang 2018	Feng 2017	Gu 2018	He 2017	Toop 2017	Yuruk 2017	Wu 2016	Kendig 2015	Toop 2015	Kuang 2014	Wu 2014	Borcarsly 2012	Wu 2011
	Title	1	FR	FR	FR	FR	FR	FR	FR	FR	FR	FR	FR	FR	FR	FR	FR
	Abstract	2	PR	FR	FR	PR	FR	PR	FR	FR	PR	PR	FR	FR	PR	PR	PR
Introduction	Background	3a.	R	R	R	R	R	R	R	R	R	R	R	R	R	R	R
		3b.	NR	R	NR	NR	NR	NR	R	NR	R	R	R	NR	NR	R	R
		Combined result	PR	FR	PR	PR	PR	PR	FR	PR	FR	FR	FR	PR	PR	FR	FR
	Objectives	4	PR	PR	PR	FR	FR	PR	FR	FR	FR	FR	FR	FR	FR	FR	FR
Methods	Ethical Statement	5	FR	FR	FR	FR	FR	FR	FR	FR	FR	FR	FR	FR	FR	FR	FR
	Study Design	6a.	R	R	R	R	R	R	R	R	R	R	R	R	R	R	R
		6b.	NR	R	R	R	R	R	R	NR	R	R	R	R	R	NR	R
		6c.	R	NR	NR	NR	NR	NR	NR	NR	R	NR	NR	NR	NR	NR	NR
		6d.	NR	NR	NR	NR	NR	R	R	NR	NR	R	R	NR	NR	NR	NR
		Combined result	PR	PR	PR	PR	PR	PR	PR	PR	PR	PR	PR	PR	PR	PR	PR
	Experimental Procedures	7a.	R	R	R	R	R	R	R	R	R	R	R	R	R	R	R
		7b.	NR	R	NR	NR	NR	NR	R	R	NR	R	R	R	NR	R	R
		7c.	NR	NR	NR	NR	NR	R	R	NR	NR	R	NR	R	NR	R	NR
		7d.	NR	R	NR	NR	NR	NR	R	R	R	R	R	R	R	R	NR
		Combined result	PR	PR	PR	PR	PR	PR	FR	PR	PR	FR	PR	FR	PR	FR	PR
	Experimental Animals	8a.	R	R	R	R	R	R	R	R	R	R	R	R	R	R	R
		8b.	NR	R	R	R	R	R	R	R	R	R	R	R	R	R	R
		8c.	NR	R	R	R	R	R	R	R	R	R	R	R	R	R	NR
		8d.	R	R	NR	R	R	NR	R	R	R	R	R	NR	NR	NR	NR
		8e.	NR	NR	R	R	NR	R	NR	R	R	R	R	R	NR	R	NR
		8f.	NR	R	NR	NR	R	R	R	R	R	R	R	NR	NR	NR	NR
		Combined result	PR	PR	PR	PR	PR	PR	PR	FR	FR	FR	FR	PR	PR	PR	PR
	Housing and Husbandry	9a.	NR	NR	NR	NR	NR	NR	R	NR	NR	R	NR	NR	NR	NR	NR
		9b.	NR	NR	NR	NR	NR	NR	NR	NR	NR	NR	NR	NR	NR	NR	NR
		9c.	NR	NR	NR	NR	NR	NR	NR	R	NR	R	NR	NR	NR	R	NR
		9d.	R	NR	NR	NR	NR	NR	N/A	N/A	NR	R	NR	NR	NR	R	NR
		9e.	NR	R	NR	NR	NR	NR	R	NR	R	R	R	NR	NR	R	NR
		9f.	NR	R	R	R	R	R	R	R	R	R	R	R	R	R	R
		9g.	NR	R	R	R	R	R	R	R	R	R	R	NR	NR	NR	NR
		9h.	PR	R	NR	NR	NR	R	R	R	NR	R	R	R	NR	R	NR
		9i.	R	NR	NR	NR	NR	NR	R	R	NR	NR	NR	NR	NR	NR	NR
		Combined result	PR	PR	PR	PR	PR	PR	PR	PR	PR	PR	PR	PR	PR	PR	PR
	Sample Size	10a	R	R	R	R	NR	R	R	R	NR	R	R	R	R	R	NR
		10b.	NR	R	NR	NR	NR	NR	NR	R	NR	NR	NR	NR	NR	NR	NR
		10c.	N/A	N/A	N/A	N/A	N/A	N/A	N/A	N/A	N/A	N/A	N/A	N/A	N/A	N/A	N/A
		Combined result	PR	FR	PR	PR	NR	PR	PR	FR	PR	PR	PR	PR	PR	PR	NR
	Allocating to experimental groups	11a.	NR	R	NR	NR	NR	NR	NR	NR	NR	NR	NR	NR	NR	NR	NR
		11b.	NR	NR	NR	NR	NR	NR	NR	NR	NR	R	NR	NR	NR	NR	NR
		Combined result	NR	PR	NR	NR	NR	NR	NR	NR	NR	PR	NR	NR	NR	NR	NR
	Experimental outcomes	12	FR	FR	FR	FR	FR	FR	FR	FR	FR	FR	FR	FR	FR	FR	FR
	Statistical methods	13a.	R	R	NR	NR	NR	R	R	R	R	R	R	R	R	R	R
		13b.	NR	R	NR	NR	NR	R	R	NR	NR	R	R	NR	NR	NR	NR
		13c.	R	R	NR	R	R	R	R	NR	R	R	R	NR	NR	R	NR
		Combined result	PR	FR	NR	PR	PR	FR	FR	PR	PR	FR	FR	PR	PR	PR	PR
Results	Baseline data	14	PR	PR	PR	FR	PR	PR	PR	FR	FR	FR	FR	PR	PR	PR	NR
	Numbers analysed	15a.	R	R	R	R	NR	R	R	R	R	R	R	R	R	R	NR
		15b.	N/A	R	N/A	N/A	N/A	N/A	N/A	R	N/A	R	N/A	N/A	N/A	N/A	N/A
		Combined result	FR	FR	FR	FR	NR	FR	FR	FR	FR	FR	FR	FR	FR	FR	NR
	Outcomes and estimation	16	FR	FR	FR	FR	FR	FR	FR	FR	FR	FR	FR	FR	FR	FR	FR
	Adverse events	17a.	N/A	R	N/A	N/A	N/A	N/A	N/A	R	N/A	R	N/A	N/A	N/A	N/A	N/A
		17b.	N/A	N/A	N/A	N/A	N/A	N/A	N/A	N/A	N/A	N/A	N/A	N/A	N/A	N/A	N/A
		Combined result	N/A	FR	N/A	N/A	N/A	N/A	N/A	FR	N/A	FR	N/A	N/A	N/A	N/A	N/A
Discusssion	Interpretation/ scientific implications	18a.	R	R	R	R	R	R	R	R	R	R	R	R	R	R	R
		18b.	NR	R	NR	R	R	NR	R	R	R	R	R	NR	NR	R	R
		18c.	NR	NR	NR	NR	NR	NR	NR	NR	NR	NR	NR	NR	NR	NR	NR
		Combined result	PR	PR	PR	PR	PR	PR	PR	PR	PR	PR	PR	PR	PR	PR	PR
	Generalisability/ translation	19	NR	NR	FR	NR	NR	NR	FR	FR	NR	FR	FR	FR	NR	FR	FR
	Funding	20	FR	FR	FR	FR	FR	FR	FR	FR	FR	FR	FR	FR	FR	FR	FR
