# Supplementary material
Source: publisher site journal article supplement (https://static.cambridge.org/content/id/urn:cambridge.org:id:article:S2040174420000823/resource/name/S2040174420000823supp001.zip)
Supplement: Supplementary file 1 [file S2040174420000823supp001.zip › S2040174420000823supp006.pdf]

[illegible]
