# Supplementary material
Source: publisher site journal article supplement (https://static.cambridge.org/content/id/urn:cambridge.org:id:article:S2040174420000823/resource/name/S2040174420000823supp001.zip)
Supplement: Supplementary file 1 [file S2040174420000823supp001.zip › S2040174420000823supp007.docx]

**Fig 1. Offspring body weight during pre-weaning period.** Offspring BW measured during PND1-28 subgroup analysed by sex (n = 7 studies; 13 experimental groups).

**Fig 2. Offspring body weight during pre-weaning period.** Offspring BW measured during PND1-28 subgroup analysed by strain (n = 7 studies; 13 experimental groups).

**Fig 3. Offspring body weight during pre-weaning period.** Offspring BW measured during PND1-28 subgroup analysed by concentration (n = 7 studies; 13 experimental groups).
