# Supplementary material
Source: publisher site journal article supplement (https://static.cambridge.org/content/id/urn:cambridge.org:id:article:S2040174420000823/resource/name/S2040174420000823supp001.zip)
Supplement: Supplementary file 1 [file S2040174420000823supp001.zip › S2040174420000823supp009.docx]

Excluded papers from full-text screening (phase 2) with reason

| *Reason for Exclusion* | *Number of studies (n)* | *Excluded Studies* |
| --- | --- | --- |
| No appropriate non-sucrose control group for comparison: | *n* = 13 | Cagiano, R., et al. (2002). "Genetic factors involved in the effects of developmental low-level alcohol induced behavioral alterations in rats." Neuropsychopharmacology **26**(2): 191-203.  Ceccanti, M., et al. (2016). "Paternal alcohol exposure in mice alters brain NGF and BDNF and increases ethanol-elicited preference in male offspring." Addiction Biology **21**(4): 776-787.  Coccurello, R., et al. (2016). "Paternal alcohol exposure in mice alters brain NGF and BDNF and increases ethanol-elicited preference in male offspring." Addiction Biology **21**(4): 776-787.  Dunlop, M., et al. (1981). "The effects of maternal carbohydrate (sucrose) supplementation on the growth of offspring of pregnancies with habitual caffeine consumption." Biol Neonate **40**(3-4): 196-198.  Gentry, G. D., et al. (1995). "Effects of prenatal maternal ethanol on male offspring progressive-ratio performance and response to amphetamine." Neurotoxicology and Teratology **17**(6): 673-677.  Gentry, G. D. and L. D. Middaugh (1988). "Prenatal ethanol weakens the efficacy of reinforcers for adult mice." Teratology **37**(2): 135-144.  Isaac, W. L., et al. (2009). "D-cycloserine and early ethanol exposure in developing rats." Psychological reports **105**(2): 472-476.  Kakihana, R., et al. (1980). "Endocrine effects of meternal alcoholization: plasma and brain testosterone, dihydrotestosterone, estradiol, and corticosterone." Alcohol Clin Exp Res **4**(1): 57-61.  Leena, H., et al. (1987). "Effect of prenatal alcohol exposure on neonatal sleep-wake behaviour and adult alcohol consumption in the AA and ANA rat lines." Alcohol and Alcoholism **22**(3): 231-240.  Monjan, A. A. and W. Mandell (1980). "Fetal alcohol and immunity: Depression of mitogen-induced lymphocyte blastogenesis." Neurobehavioral Toxicology and Teratology **2**(3): 213-215.  Perez, V. J., et al. (1983). "Exposure to ethanol during pregnancy in mice: potential importance of dose for the development of tolerance in offspring." Physiology and Behavior **30**(3): 485-488.  Ruff, J. S., et al. (2015). "Compared to sucrose, previous consumption of fructose and glucose monosaccharides reduces survival and fitness of female mice." Journal of Nutrition **145**(3): 434-441. |
| Non sucrose interventional study | *n* = 8 | Altshuler, G. and A. Ornoy (1986). "Thickness of renal glomerular capillary basement membrane in the offspring of diabetic rats fed a regular or high-sucrose diet." Cells Tissues Organs **126**(4): 237-239.  Belpoggi, F., et al. (2006). "Results of long-term carcinogenicity bioassays on Coca-Cola administered to Sprague-Dawley rats." Living in a Chemical World: Framing the Future in Light of the Past **Annals of the New York Academy of Sciences. 1076**: 736-752.  Bezpalko, L., et al. (2015). "Inflammatory response in visceral fat tissue and liver is prenatally programmed: Experimental research." Journal of Physiology and Pharmacology **66**(1): 57-64.  Lee, W. C., et al. (2016). "Maternal Fructose Exposure Programs Metabolic Syndrome-Associated Bladder Overactivity in Young Adult Offspring." Scientific reports **6**: 34669.  Ruff, J., et al. (2014). "A novel method for detecting dietary (and other) toxicities: Quantifying the adverse effects of added sugar consumption." FASEB Journal. Conference: Experimental Biology **28**(1 SUPPL. 1).  Ruff, J. S., et al. (2013). "Human-relevant levels of added sugar consumption increase female mortality and lower male fitness in mice." Nature Communications **4 (no pagination)**(2245).  Singh, S. P., et al. (1984). "Effects of ethanol ingestion on maternal and fetal glucose homeostasis." J Lab Clin Med **104**(2): 176-184.  Tanaka, H., et al. (1982). "Hypoglycemia in the fetal alcohol syndrome in rat." Brain and Development **4**(2): 97-103. |
| No maternal intervention exposure during  pre-gestation and/or gestation and/or lactation | *n* = 11 | Cicek, F. A., et al. (2014). "Di-peptidyl peptidase-4 inhibitor sitagliptin protects vascular function in metabolic syndrome: possible role of epigenetic regulation." Mol Biol Rep **41**(8): 4853-4863.  Cordero, P., et al. (2013). "Maternal methyl donors supplementation during lactation prevents the hyperhomocysteinemia induced by a high-fat-sucrose intake by Dams." International Journal of Molecular Sciences **14**(12): 24422-24437.  Cordero, P., et al. (2013). "Transcriptomic and epigenetic changes in early liver steatosis associated to obesity: effect of dietary methyl donor supplementation." Mol Genet Metab **110**(3): 388-395.  David, E. S., et al. (1995). "Dietary induction of intestinal fructose absorption in weaning rats." Pediatric Research **37**(6): 777-782.  Hilakivi, L., et al. (1987). "Effect of prenatal alcohol exposure on neonatal sleep-wake behaviour and adult alcohol consumption in the AA and ANA rat lines." Alcohol and alcoholism (Oxford, Oxfordshire) **22**(3): 231-240  Quiclet, C., et al. (2017). "Maternal exercise modifies body composition and energy substrates handling in male offspring fed a high-fat/high-sucrose diet." Journal of Physiology **595**(23): 7049-7062.  Quiclet, C., et al. (2015). "Effect of maternal exercise during gestation on high-fat high-sucrose diet-fed offspring: Body composition, glucose tolerance and energy substrates management." Clinical Nutrition **1)**: S35.  Quiclet, C., et al. (2016). "Effects of maternal exercise before and during gestation or during lactation on offspring metabolic health: Body composition pancreatic function and energy substrates management." Clinical Nutrition **35 (Supplement 1)**: S126.  Ramirez, I. and J. L. Fuller (1976). "Genetic influence on water and sweetened water consumption in mice." Physiology and Behavior **16**(2): 163-168.  Sognnaes, R. F. (1948). "Caries-conducive effect of a purified diet when fed to rodents during tooth development." Journal of the American Dental Association **37**(6): 676-692.  Villegas-Romero, M., et al. (2018). "Short-term exposure to high sucrose levels near weaning has a similar long-lasting effect on hypertension as a long-term exposure in rats." Nutrients **10 (6) (no pagination)**(728). |
| Pair feeding models | *n = 70* | Anandam, N., et al. (1980). "In utero alcohol heightens juvenile reactivity." Pharmacology Biochemistry and Behavior **13**(4): 531-535.  Angelogianni, P. and C. Gianoulakis (1989). "Prenatal exposure to ethanol alters the ontogeny of the beta-endorphin response to stress." Alcoholism: Clinical and Experimental Research **13**(4): 564-571.  Angelucci, F., et al. (1997). "Prenatal exposure to ethanol causes differential effects in nerve growth factor and its receptor in the basal forebrain of preweaning and adult rats." Journal of Neural Transplantation & Plasticity **6**(2): 63-71.  Barbaccia, M. L., et al. (2007). "Cognitive impairment and increased brain neurosteroids in adult rats perinatally exposed to low millimolar blood alcohol concentrations." Psychoneuroendocrinology **32**(8-10): 931-942.  Barnes, D. E. and D. W. Walker (1981). "Prenatal ethanol exposure permanently reduces the number of pyramidal neurons in rat hippocampus." Brain Res **227**(3): 333-340.  Becker, H. C., et al. (1988). "Effect of prenatal ethanol exposure on response to abrupt reward reduction." Neurotoxicology and Teratology **10**(2): 121-125.  Belenichev, I. F., et al. (2016). "Pharmacological modulation of heat shock protein 70 (hsp70) - Dependent mechanisms of endogenous neuroprotection in conditions of prenatal chronic alcoholism by cerebrocurin and tiocetam." Klinik Psikofarmakoloji Bulteni **26**(2): 103-108.  Bond, N. W. (1980). "Postnatal alcohol exposure in the rat: Its effects on avoidance conditioning, Hebb-Williams maze performance, maternal behavior, and pup development." Physiological Psychology **8**(4): 437-443.  Bond, N. W. (1981). "Effects of prenatal ethanol exposure on avoidance conditioning in high- and low-avoidance rat strains." Psychopharmacology **74**(2): 177-181.  Bond, N. W. (1982). "Prenatal exposure to ethanol: Association between increased gestational length and offspring mortality." Neurobehavioral Toxicology and Teratology **4**(5): 501-503.  Bond, N. W. (1985). "Prenatal ethanol exposure and hyperactivity in rats: Effects of d-amphetamine and alpha-methyl-p-tyrosine." Neurobehavioral Toxicology and Teratology **7**(5): 461-467.  Bond, N. W. (1985). "Prenatal alcohol exposure and offspring hyperactivity: The effects of home-cage shavings and test chamber temperature." Physiological Psychology **13**(4): 248-252.  Bond, N. W. (1986). "Prenatal alcohol exposure and offspring hyperactivity: Effects of para-chlorophenylalanine and methysergide." Neurobehavioral Toxicology and Teratology **8**(6): 667-673.  Bond, N. W. (1988). "Prenatal alcohol exposure and offspring hyperactivity: Effects of physostigmine and neostigmine." Neurotoxicology and Teratology **10**(1): 59-63.  Branchey, L. and A. J. Friedhoff (1973). "The influence of ethanol administered to pregnant rats on tyrosine hydroxylase activity of their offspring." Psychopharmacologia **32**(2): 151-156.  Crusio, W. E., et al. (1998). "The effects of prenatal exposure to ethanol on hippocampal neuroanatomy and spatial learning in a radial maze in three inbred mouse strains." American Journal of Medical Genetics - Neuropsychiatric Genetics **81**(6): 473.  Fakoya, F. A. (2005). "Persistent neocortical astrogliosis in adult wistar rats following prenatal ethanol exposure." Brain and Development **27**(4): 259-265.  Fakoya, F. A. and E. A. Caxton-Martins (2006). "Neocortical neurodegeneration in young adult Wistar rats prenatally exposed to ethanol." Neurotoxicology and Teratology **28**(2): 229-237.  Gianoulakis, C. (1987). "Effect of prenatal exposure to ethanol on body growth and the pituitary beta-endorphin." Alcoholism: Clinical and Experimental Research **11**(6): 567-573.  Gianoulakis, C. (1990). "Rats exposed prenatally to alcohol exhibit impairment in spatial navigation test." Behavioural Brain Research **36**(3): 217-228.  Hannigan, J. H., et al. (1988). "Absence of differential motoric and thermic responses to clonidine in young rats exposed prenatally to alcohol." Alcohol **5**(6): 431-436.  Harris, R. A. and J. Case (1979). "Effects of maternal consumption of ethanol, barbital, or chlordiazepoxide on the behavior of the offspring." Behavioral and Neural Biology **26**(2): 234-247.  Heaton, M. B., et al. (1995). "Alterations in responsiveness to ethanol and neurotrophic substances in fetal septohippocampal neurons following chronic prenatal ethanol exposure." Developmental Brain Research **85**(1): 1-13.  Heaton, M. B., et al. (1996). "Influence of prenatal ethanol exposure on cholinergic development in the rat striatum." Journal of Comparative Neurology **364**(1): 113-120.  Hellemans, K. G. C., et al. (2010). "Prenatal Alcohol Exposure and Chronic Mild Stress Differentially Alter Depressive- and Anxiety-Like Behaviors in Male and Female Offspring." Alcoholism-Clinical and Experimental Research **34**(4): 633-645.  Jungkuntz-Burgett, L., et al. (1990). "Reduced sensitivity of hypothalamic-preoptic area norepinephrine and dopamine to testosterone feedback in adult fetal ethanol-exposed male rats." Alcohol **7**(6): 513-516.  Kanai, T., et al. (2011). "Can ipsapirone, a serotonin 1A receptor agonist, mitigate a developmental defect of the serotonergic system caused by prenatal exposure to ethanol?" Congenital Anomalies **51 (4)**: A6.  Kervern, M., et al. (2010). "Pre and postnatal chronic ethanol exposure facilitates long-term synaptic depression in adolescent rat hippocampus slice." Alcoholism: Clinical and Experimental Research **3)**: 112A.  Kotkoskie, L. A. and S. Norton (1989). "Cerebral cortical morphology and behavior in rats following acute prenatal ethanol exposure." Alcoholism: Clinical and Experimental Research **13**(6): 776-781.  La Fiette, M. H., et al. (1994). "Effects of prenatal alcohol exposure on serial pattern performance in the rat." Neurotoxicology and Teratology **16**(1): 41-46.  Lam, M. K. P., et al. (2000). "Second generation effects of maternal alcohol consumption during pregnancy in rats." Progress in Neuro-Psychopharmacology and Biological Psychiatry **24**(4): 619-631.  Lee, J. H. and D. G. Skalnik (2005). "CpG-binding protein (CXXC finger protein 1) is a component of the mammalian Set1 histone H3-Lys4 methyltransferase complex, the analogue of the yeast Set1/COMPASS complex." Journal of Biological Chemistry **280**(50): 41725-41731.  Lee, S. and C. Rivier (1993). "Prenatal Alcohol Exposure Blunts Interleukin‐1‐Induced ACTH and β‐Endorphin Secretion by Immature Rats." Alcoholism: Clinical and Experimental Research **17**(5): 940-945.  Lin, G. W. J. (1989). "Effect of Ethanol and Vitamin B6 Deficiency on Pyridoxal 5‐Phosphate Levels and Fetal Growth in Rat." Alcoholism: Clinical and Experimental Research **13**(2): 236-239.  Lin, G. W. J. (1988). "Folate deficiency and acute ethanol treatment on pregnancy outcome in the rat." Nutrition Research **8**(10): 1151-1160.  Lin, G. W. J. (1991). "Effect of dietary folic acid levels and gestational ethanol consumption on tissue folate contents and rat fetal development." Nutrition Research **11**(2-3): 223-230.  Lochry, E. A. and E. P. Riley (1980). "Retention of passive avoidance and T-maze escape in rats exposed to alcohol prenatally." Neurobehavioral Toxicology and Teratology **2**(2): 107-115.  Mankes, R. F., et al. (1992). "Preferential alcoholic embryopathy: effects of liquid diets." Lab Anim Sci **42**(6): 561-566.  McGivern, R. F., et al. (1998). "Ethanol exposure during the last week of gestation in the rat: Inhibition of the prenatal testosterone surge in males without long-term alterations in sex behavior." Neurotoxicology and Teratology **20**(4): 483-490.  Middaugh, L. D. and K. L. Ayers (1988). "Effects of ethanol on mature offspring of mice given ethanol during pregnancy." Alcoholism: Clinical and Experimental Research **12**(3): 388-393.  Middaugh, L. D. and W. O. Boggan (1995). "Perinatal maternal ethanol effects on pregnant mice and on offspring viability and growth: Influences of exposure time and weaning diet." Alcoholism: Clinical and Experimental Research **19**(5): 1351-1358.  Middaugh, L. D., et al. (1994). "Prenatal ethanol effects and dopamine systems of adults C57 male mice." Neurotoxicology and Teratology **16**(2): 207-212.  Middaugh, L. D. and G. D. Gentry (1992). "Prenatal ethanol effects on reward efficacy for adult mice are gestation stage specific." Neurotoxicology and Teratology **14**(5): 365-370.  Middaugh, L. D., et al. (1988). "Prenatal ethanol exposure in C57 mice: Effects on pregnancy and offspring development." Neurotoxicology and Teratology **10**(2): 175-180.  Moore, D. B., et al. (1998). "Prenatal ethanol exposure reduces parvalbumin-immunoreactive gabergic neuronal number in the adult rat cingulate cortex." Neuroscience Letters **249**(1): 25-28.  Moore, D. B., et al. (1997). "Effects of prenatal ethanol exposure on parvalbumin-expressing GABAergic neurons in the adult rat medial septum." Alcoholism: Clinical and Experimental Research **21**(5): 849-856.  Mousavi, S. N., et al. (2016). "Comparison of maternal isocaloric high carbohydrate and high fat diets on osteogenic and adipogenic genes expression in adolescent mice offspring." Nutrition & Metabolism **13**: 10.  Nagahara, A. H. and R. J. Handa (1995). "Fetal alcohol exposure alters the induction of immediate early gene mRNA in the rat prefrontal cortex after an alternation task." Alcoholism: Clinical and Experimental Research **19**(6): 1389-1397.  Nagahara, A. H. and R. J. Handa (1999). "Loss of nicotine-induced effects on locomotor activity in fetal alcohol-exposed rats." Neurotoxicology and Teratology **21**(6): 647-652.  Nagahara, A. H. and R. J. Handas (1997). "Fetal alcohol exposure produces delay-dependent memory deficits in juvenile and adult rats." Alcoholism: Clinical and Experimental Research **21**(4): 710-715.  Nagahara, A. H. and R. J. Handa (1999). "Fetal alcohol-exposed rats exhibit differential response to cholinergic drugs on a delay-dependent memory task." Neurobiology of Learning and Memory **72**(3): 230-243.  Ohta, K., et al. (2010). "Influence of maternal ethanol intake on the expression of conditioned and unconditioned fear in rat offspring." Congenital Anomalies **50 (4)**: A16-A17.  Ohta, K. I., et al. (2010). "Alteration in anxiety-related behaviors and reduction of serotonergic neurons in raphe nuclei in adult rats prenatally exposed to ethanol." Congenital Anomalies **50**(2): 105-114.  Randall, C. L., et al. (1987). "Effect of indomethacin on alcohol-induced morphological anomalies in mice." Life Sciences **41**(3): 361-369.  Randall, C. L., et al. (1986). "Effect of prenatal ethanol exposure on activity and shuttle avoidance behavior in adult C57 mice." Alcohol and Drug Research **6**(5): 351-360.  Randall, C. L., et al. (1985). "Effect of prenatal ethanol exposure on activity and shuttle avoidance behavior in adult C57 mice." Alcohol and Drug Research **6**(5): 351-360.  Shaywitz, B. A., et al. (1979). "Hyperactivity and cognitive deficits in developing rat pups born to alcoholic mothers: An experimental model of the expanded fetal alcohol syndrome (EFAS)." Neurobehavioral Toxicology and Teratology **1**(2): 113-122.  Sorette, M. P., et al. (1980). "Maternal ethanol intake affects rat organ development despite adequate nutrition." Neurobehavioral Toxicology and Teratology **2**(3): 181-188.  Soria, A., et al. (1996). "A sucrose-rich diet affects triglyceride metabolism differently in pregnant and nonpregnant rats and has negative effects on fetal growth." Journal of Nutrition **126**(10): 2481-2486.  Swanson, D. J., et al. (1995). "Chronic prenatal ethanol exposure alters the normal ontogeny of choline acetyltransferase activity in the rat septohippocampal system." Alcoholism: Clinical and Experimental Research **19**(5): 1252-1260.  Swanson, D. J., et al. (1996). "Influence of chronic prenatal ethanol on cholinergic neurons of the septohippocampal system." Journal of Comparative Neurology **364**(1): 104-112.  Tipyasang, R., et al. (2014). "Enriched environment attenuates changes in water-maze performance and bdnf level caused by prenatal alcohol exposure." EXCLI Journal **13**: 536-547.  Ulug, S. and E. P. Riley (1983). "The effect of methylphenidate on overactivity in rats prenatally exposed to alcohol." Neurobehavioral Toxicology and Teratology **5**(1): 35-39.  Volk, B. (1984). "Cerebellar histogenesis and synaptic maturation following pre- and postnatal alcohol administration. An electron-microscopic investigation of the rat cerebellar cortex." Acta Neuropathologica **63**(1): 57-65.  Volk, B., et al. (1981). "Impaired maturation of Purkinje cells in the fetal alcohol syndrome of the rat - Light and electron microscopic investigations." Acta Neuropathologica **54**(1): 19-29.  Wainwright, P. and G. Fritz (1985). "Effect of moderate prenatal ethanol exposure on postnatal brain and behavioral development in BALB/c mice." Experimental Neurology **89**(1): 237-249.  Wainwright, P., et al. (1985). "Combined effects of moderate ethanol consumption and a low-protein diet during gestation on brain development in BALB/c mice." Experimental Neurology **90**(2): 422-433.  Webb, B., et al. (2003). "Nerve growth factor and chronic ethanol treatment alter calcium homeostasis in developing rat septal neurons." Developmental Brain Research **143**(1): 57-71.  Wilson, M. E. and R. J. Handa (1997). "Gonadotropin secretion in infantile rats exposed to ethanol in utero." Alcohol **14**(5): 497-501.  Youngentob, S. L. and J. I. Glendinning (2009). "Fetal ethanol exposure increases ethanol intake by making it smell and taste better." Proceedings of the National Academy of Sciences of the United States of America **106**(13): 5359-5364. |
| Non free feeding models: | *n* = 17 | Abel, E. L., et al. (1987). "Prenatal alcohol exposure shortens life span in rats." Teratology **36**(2): 217-220.  Abel, E. L. and B. A. Dintcheff (1986). "Effects of prenatal alcohol exposure on behavior of aged rats." Drug and Alcohol Dependence **16**(4): 321-330.  Berman, R. F., et al. (1996). "Prenatal alcohol exposure and the effects of environmental enrichment on hippocampal dendritic spine density." Alcohol **13**(2): 209-216.  Cardon, A. L., et al. (2004). "Exposure to cadmium during gestation and lactation decreases cocaine self-administration in rats." NeuroToxicology **25**(5): 869-875.  Choi, C. S., et al. (2015). "High sucrose consumption during pregnancy induced ADHD-like behavioral phenotypes in mice offspring." Journal of Nutritional Biochemistry **26**(12): 1520-1526.  Fritz, H. and R. Hess (1968). "Prenatal development in the rat following administration of cyclamate, saccharin and sucrose." Experientia **24**(11): 1140-1141.  Gilliam, D. M., et al. (1990). "Responses to ethanol challenge in Long- and Short-Sleep mice prenatally exposed to alcohol." Alcohol **7**(1): 1-5.  Gilliam, D. M. and L. E. Kotch (1990). "Alcohol-related birth defects in long- and short-sleep mice: Postnatal litter mortality." Alcohol **7**(6): 483-487.  Gilliam, D. M., et al. (1987). "Fetal alcohol effects in Long- and Short-Sleep mice: Activity, passive avoidance, and in utero ethanol levels." Neurotoxicology and Teratology **9**(5): 349-357.  Mothes, H. K., et al. (1996). "Effects of prenatal ethanol exposure and early experience on home-cage and open-field activity in mice." Neurotoxicology and Teratology **18**(1): 59-65.  Opitz, B., et al. (1997). "Effects of prenatal ethanol exposure and early experience on radial maze performance and conditioned taste aversion in mice." Neurotoxicology and Teratology **19**(3): 185-190.  Ribeiro-da-Silva, N. F., et al. (1994). "Effects of ethanol and malnutrition on rat neuromotor development." Brazilian Journal of Medical and Biological Research **27**(6): 1377-1383.  Royalty, J. (1990). "Effects of prenatal ethanol exposure on juvenile play-fighting and postpubertal aggression in rats." Psychological Reports **66**(2): 551-560.  Vorhees, C. V. (1988). "Maternal age as a factor in determining the reproductive and behavioral outcome of rats prenatally exposed to ethanol." Neurotoxicology and Teratology **10**(1): 23-34.  Vorhees, C. V. (1989). "A fostering/crossfostering analysis of the effects of prenatal ethanol exposure in a liquid diet on offspring development and behavior in rats." Neurotoxicology and Teratology **11**(2): 115-120.  Vorhees, C. V., et al. (1988). "Effects of short-term prenatal alcohol exposure on neuronal membrane order in rats." Brain research **466**(2): 161-166.  Wijayawardhane, N., et al. (2007). "Postnatal aniracetam treatment improves prenatal ethanol induced attenuation of AMPA receptor-mediated synaptic transmission." Neurobiology of Disease **26**(3): 696-706. |
| High fat and/or protein/calorie restriction diets | *n* = 122 | Aiken, C. E., et al. (2016). "Decreased ovarian reserve, dysregulation of mitochondrial biogenesis, and increased lipid peroxidation in female mouse offspring exposed to an obesogenic maternal diet." FASEB Journal **30**(4): 1548-1556.  Alexandre, L., et al. (2013). "Experimental western style-diet (high in sugar, lipids, sodium and poor in Fiber) cause cues of metabolic disease in rats." Annals of Nutrition and Metabolism **2)**: 28-29.  Aye, I., et al. (2014). "Maternal adiponectin inhibits placental insulin-signaling by PPARalpha-mediated ceramide synthesis and prevents fetal overgrowth associated with maternal obesity." Reproductive Sciences **1)**: 76A.  Aye, I. L., et al. (2015). "Adipose tissue inflammation, ER stress and insulin resistance in obese pregnant mice with fetal overgrowth." Reproductive Sciences **1)**: 64A.  Bayol, S. A., et al. (2007). "A maternal 'junk food' diet in pregnancy and lactation promotes an exacerbated taste for 'junk food' and a greater propensity for obesity in rat offspring." British Journal of Nutrition **98**(4): 843-851.  Bayol, S. A., et al. (2009). "Evidence that a maternal "junk food" diet during pregnancy and lactation can reduce muscle force in offspring." European Journal of Nutrition **48**(1): 62-65.  Bayol, S. A., et al. (2008). "Offspring from mothers fed a 'junk food' diet in pregnancy and lactation exhibit exacerbated adiposity that is more pronounced in females." Journal of Physiology **586**(13): 3219-3230.  Bayol, S. A., et al. (2010). "A maternal "junk food" diet in pregnancy and lactation promotes nonalcoholic fatty liver disease in rat offspring." Endocrinology **151**(4): 1451-1461.  Berton, T. R., et al. (2011). "Early developmental exposures to a high carbohydrate/high fat diet affect glucose metabolism and mammary cancer susceptibility." Cancer Research. Conference: 34th Annual CTRC AACR San Antonio Breast Cancer Symposium. San Antonio, TX United States. Conference Publication: **71**(24 SUPPL. 3).  Blackmore, H. L., et al. (2014). "Maternal diet-induced obesity programs cardiovascular dysfunction in adult male mouse offspring independent of current body weight." Endocrinology **155**(10): 3970-3980.  Boque, N., et al. (2013). "Prevention of diet-induced obesity by apple polyphenols in Wistar rats through regulation of adipocyte gene expression and DNA methylation patterns." Mol Nutr Food Res **57**(8): 1473-1478.  Brenseke, B. M., et al. (2011). "Maternai high fat diet results in poor birth outcome and impaired physical development." Birth Defects Research Part A - Clinical and Molecular Teratology **91 (5)**: 374.  Caluwaerts, S., et al. (2007). "Diet-induced obesity in gravid rats engenders early hyperadiposity in the offspring." Metabolism: Clinical and Experimental **56**(10): 1431-1438.  Cardenas-Perez, R. E., et al. (2018). "Maternal overnutrition by hypercaloric diets programs hypothalamic mitochondrial fusion and metabolic dysfunction in rat male offspring." Nutrition and Metabolism **15 (1) (no pagination)**(38).  Chin, E. H., et al. (2017). "A maternal high-fat, high-sucrose diet has sex-specific effects on fetal glucocorticoids with little consequence for offspring metabolism and voluntary locomotor activity in mice." PLoS ONE **12 (3) (no pagination)**(e0174030).  Choo, E. and R. Dando (2017). "Maternal obesity increases sweet taste response and sweet taste receptor mRNA expression in adult offspring." FASEB Journal. Conference: Experimental Biology **31**(1 Supplement 1).  Cordero, P., et al. (2012). "Maternal weight gain induced by an obesogenic diet affects adipose accumulation, liver weight, and insulin homeostasis in the rat offspring depending on the sex." Journal of Endocrinological Investigation **35**(11): 981-986.  Cordero, P., et al. (2013). "Maternal methyl donors supplementation during lactation prevents the hyperhomocysteinemia induced by a high-fat-sucrose intake by Dams." International Journal of Molecular Sciences **14**(12): 24422-24437.  Cordero, P., et al. (2014). "Supplementation with methyl donors during lactation to high-fat-sucrose-fed dams protects offspring against liver fat accumulation when consuming an obesogenic diet." Journal of developmental origins of health and disease **5**(5): 385-395.  Cordero, P., et al. (2015). "Perinatal maternal feeding with an energy dense diet and/or micronutrient mixture drives offspring fat distribution depending on the sex and growth stage." Journal of Animal Physiology and Animal Nutrition **99**(5): 834-840.  Couvreur, O., et al. (2011). "Unexpected long-term protection of adult offspring born to high-fat fed dams against obesity induced by a sucrose-rich diet." PLoS ONE **6 (3) (no pagination)**(e18043).  Cunningham, R. P., et al. (2018). "Maternal Physical Activity and Sex Impact Markers of Hepatic Mitochondrial Health." Med Sci Sports Exerc.  Cuthbert, C. E., et al. (2017). "A maternal high-fat, high-sucrose diet alters insulin sensitivity and expression of insulin signalling and lipid metabolism genes and proteins in male rat offspring: effect of folic acid supplementation." The British journal of nutrition **118**(8): 580-588.  Dearden, L. and N. Balthasar (2014). "Sexual dimorphism in offspring glucose-sensitive hypothalamic gene expression and physiological responses to maternal high-fat diet feeding." Endocrinology **155**(6): 2144-2154.  Dennison, C., et al. (2013). "Fetal programming of metabolic health through a combined dietary and pharmacological pre-pregnancy intervention in rats." FASEB Journal. Conference: Experimental Biology **27**(Meeting Abstracts).  Dennison, C., et al. (2013). "Can a dietary and pharmacological pre-pregnancy intervention improve the metabolic health of male offspring of obese sprague-dawley rats?" Canadian Journal of Diabetes **2)**: S227.  Dennison, C. A., et al. (2017). "Preconception prebiotic and sitagliptin treatment in obese rats affects pregnancy outcomes and offspring microbiota, adiposity, and glycemia." Frontiers in Endocrinology **8 (OCT) (no pagination)**(301).  Desai, N., et al. (2012). "Diet-induced fetal inflammation is suppressed by maternal metformin." American Journal of Obstetrics and Gynecology **1)**: S25-S26.  Diaz, P., et al. (2015). "Increased trophoblast fatty acid transporter protein-6 expression and lipid accumulation in the fetal liver in a mouse model of maternal obesity." Reproductive Sciences **1)**: 372A.  Fornes, R., et al. (2017). "The effect of androgen placental function and excess on maternal metabolism, fetal growth in obese dams." Endocrine Reviews. Conference: 99th Annual Meeting of the Endocrine Society, ENDO **38**(3 Supplement 1).  Gossling, M., et al. (2016). "Adiponectin supplementation in pregnant mice improves glucose tolerance in offspring." Journal of Investigative Medicine **64 (1)**: 317.  Gracia, A., et al. (2014). "Fatty acid synthase methylation levels in adipose tissue: effects of an obesogenic diet and phenol compounds." Genes Nutr **9**(4): 411.  Gugusheff, J. R., et al. (2014). "Naloxone treatment alters gene expression in the mesolimbic reward system in 'junk food' exposed offspring in a sex-specific manner but does not affect food preferences in adulthood." Physiology and Behavior **133**: 14-21.  Guidotti, S., et al. (2013). "High-saturated fat-sucrose feeding affects lactation energetics in control mice and mice selectively bred for high wheel-running behavior." American Journal of Physiology - Regulatory Integrative and Comparative Physiology **305**(12): R1433-R1440.  Hallam, M. C. and R. A. Reimer (2016). "Impact of diet composition in adult offspring is dependent on maternal diet during pregnancy and lactation in rats." Nutrients **8**(1).  Harris, K., et al. (2015). "Maternal metformin attenuates diet-induced changes in fetal liver fatty acid metabolism." Reproductive Sciences **1)**: 264A-265A.  Hauser, J., et al. (2018). "Effects of omega-3 fatty acids and sugar on attention in the spontaneously hypertensive rat." Journal of Functional Foods **48**: 676-681.  Hernandez, A., et al. (2012). "Maternal insulin resistance and exposure to high sucrose and fat diet lead to impairment of glucose metabolism, hepatic insulin signaling pathway, and global DNA hypermethylation in the offspring." Journal of Nutrigenetics and Nutrigenomics **5 (4-5)**: 196.  Hill, C. M., et al. (2015). "Female PAPP-A knockout mice are resistant to metabolic dysfunction induced by high-fat/high-sucrose feeding at middle age." Age (Dordr) **37**(3): 9765.  Hiramatsu, L., et al. (2017). "Maternal exposure to Western diet affects adult body composition and voluntary wheel running in a genotype-specific manner in mice." Physiology and Behavior **179**: 235-245.  Intapad, S., et al. (2012). "A postnatal diet rich in fat and sucrose leads to the differential alterations in renal function and metabolic health in male control and intrauterine growth restricted offspring." Hypertension. Conference: High Blood Pressure Research **60**(3 Meeting Abstracts).  Janthakhin, Y., et al. (2017). "Maternal high-fat diet leads to hippocampal and amygdala dendritic remodeling in adult male offspring." Psychoneuroendocrinology **83**: 49-57.  Jayaratne, S., et al. (2017). "Maternal high fat-high sucrose diet is associated with elevated offspring hypothalamic oxidative stress and blood pressure responses to psychological stress." FASEB Journal. Conference: Experimental Biology **31**(1 Supplement 1).  Kawakubo-Yasukochi, T., et al. (2016). "Maternal oral administration of osteocalcin protects offspring from metabolic impairment in adulthood." Obesity **24**(4): 895-907.  Kereliuk, S. M., et al. (2016). "Gestational diabetes programs mitochondrial dysfunction and impairs cardiac function in the offspring." Canadian Journal of Cardiology **32 (10 Supplement 1)**: S82-S83.  King, V., et al. (2011). "Maternal obesity during pregnancy -The effects on maternal physiology, fetal and placental development in mice." Reproductive Sciences **1)**: 330A.  King, V., et al. (2013). "The effects of an obesogenic diet during pregnancy on fetal growth and placental gene expression are gestation dependent." Placenta **34**(11): 1087-1090.  King, V., et al. (2014). "Post-weaning diet determines metabolic risk in mice exposed to overnutrition in early life." Reproductive Biology and Endocrinology **12 (1) (no pagination)**(73).  Kjaergaard, M., et al. (2018). "Hypothalamic oxidative stress and inflammation, and peripheral glucose homeostasis in Sprague-Dawley rat offspring exposed to maternal and postnatal chocolate and soft drink." Nutrition and Diabetes **8 (1) (no pagination)**(44).  Kjaergaard, M., et al. (2014). "Maternal chocolate and sucrose soft drink intake induces hepatic steatosis in rat offspring associated with altered lipid gene expression profile." Acta Physiologica **210**(1): 142-153.  Kjaergaard, M., et al. (2017). "Differential hypothalamic leptin sensitivity in obese rat offspring exposed to maternal and postnatal intake of chocolate and soft drink." Nutrition and Diabetes **7 (1) (no pagination)**(e242).  Lager, S., et al. (2013). "Diet-induced obesity in mice reduces placental efficiency and mTOR signaling." Reproductive Sciences **1)**: 255A.  Latouche, C., et al. (2014). "Maternal overnutrition programs changes in the expression of skeletal muscle genes that are associated with insulin resistance and defects of oxidative phosphorylation in adult male rat offspring." Journal of Nutrition **144**(3): 237-244.  Le Foll, C., et al. (2009). "Effects of maternal genotype and diet on offspring glucose and fatty acid-sensing ventromedial hypothalamic nucleus neurons." American Journal of Physiology - Regulatory Integrative and Comparative Physiology **297**(5): R1351-R1357.  Levin, B. E. and E. Govek (1998). "Gestational obesity accentuates obesity in obesity-prone progeny." American Journal of Physiology - Regulatory Integrative and Comparative Physiology **275**(4 44-4): R1374-R1379.  Li, J., et al. (2018). "Folate treatment of pregnant rat dams abolishes metabolic effects in female offspring induced by a paternal pre-conception unhealthy diet." Diabetologia **61**(8): 1862-1876.  Li, J., et al. (2016). "Interaction between maternal obesity and Hedgehog signalling influences immune cell development in the foetal liver." Hepatology **64 (1 Supplement 1)**: 516A-517A.  Lomba, A., et al. (2010). "Obesity induced by a pair-fed high fat sucrose diet: methylation and expression pattern of genes related to energy homeostasis." Lipids Health Dis **9**: 60.  Manti, M., et al. (2018). "Maternal androgen excess and obesity induce sexually dimorphic anxiety-like behavior in the offspring." FASEB Journal **32**(8): 4158-4171.  Mao, J. D., et al. (2018). "In Utero and Postnatal Exposure to High Fat, High Sucrose Diet Suppressed Testis Apoptosis and Reduced Sperm Count." Scientific Reports **8**: 11.  McKee, S. E. and T. M. Reyes (2016). "Early life methyl donor supplementation attenuates obesity-risk." FASEB Journal. Conference: Experimental Biology **30**(Meeting Abstracts).  Moley, K., et al. (2017). "Maternal obesity programs transgenerational mitochondrial dysfunction via the original, maternal oocytes, not due to exposure during gestation." Human Reproduction **32 (Supplement 1)**: i30-i31.  Morzel, M., et al. (2015). "Consequences of a high sugar/high fat maternal diet on protein expression in young rat salivary glands." Acta Physiologica **214 (S700)**: 15.  Morzel, M., et al. (2018). "Protein expression in submandibular glands of young rats is modified by a high-fat/high-sugar maternal diet." Arch Oral Biol **96**: 87-95.  Mouralidarane, A., et al. (2011). "Maternal obesity during pregnancy and lactation programs development of non-alcoholic fatty liver disease in offspring fed a postnatal hyper-calorifi c diet." Reproductive Sciences **1)**: 216A.  Mughal, W., et al. (2014). "Determining the role of skeletal muscle microRNA-133a in early-onset insulin resistance." Canadian Journal of Diabetes **5)**: S66.  Mukerjee, S., et al. (2017). "Prenatal exposure to mild high fat diet paradoxically leads to improvement in cardiometabolic function in the offspring." FASEB Journal. Conference: Experimental Biology **31**(1 Supplement 1).  Mukerjee, S., et al. (2018). "Perinatal Exposure to Western Diet Programs Autonomic Dysfunction in the Male Offspring." Cellular and Molecular Neurobiology **38**(1): 233-242.  Musial, B., et al. (2014). "A diet high in sugar and fat alters the insulin signalling in the mouse placenta." Placenta **35 (9)**: A70.  Musial, B., et al. (2017). "A Western-style obesogenic diet alters maternal metabolic physiology with consequences for fetal nutrient acquisition in mice." Journal of Physiology **595**(14): 4875-4892.  Naville, D., et al. (2012). "Food contaminants, maternal obesity and metabolic status of the male and female offspring in a rodent model." Obesity Facts **1)**: 140.  Nivoit, P., et al. (2009). "Established diet-induced obesity in female rats leads to offspring hyperphagia, adiposity and insulin resistance." Diabetologia **52**(6): 1133-1142.  Oben, J. A., et al. (2010). "Maternal obesity programmes offspring development of non-alcoholic fatty pancreas disease." Biochemical and Biophysical Research Communications **394**(1): 24-28.  Okeyo-Owuor, T., et al. (2017). "Exposure to maternal obesogenic diet worsens some but not all pre-cancer phenotypes in a murine genetic model of prostate cancer." PLoS One **12**(5): e0175764.  Ong, Z. Y. and B. S. Muhlhausler (2011). "Maternal "junk-food" feeding of rat dams alters food choices and development of the mesolimbic reward pathway in the offspring." FASEB Journal **25**(7): 2167-2179.  Owuor, T. O., et al. (2018). "Maternal obesogenic diet induces endometrial hyperplasia, an early hallmark of endometrial cancer, in a diethylstilbestrol mouse model." PLoS ONE **13 (5) (no pagination)**(e0186390).  Paradis, J., et al. (2017). "Perinatal western diet consumption leads to profound plasticity and GABAergic phenotype changes within hypothalamus and reward pathway from birth to sexual maturity in rat." Frontiers in Endocrinology **8 (AUG) (no pagination)**(216).  Paul, H., et al. (2013). "The addition of the prebiotic fiber oligofructose to a maternal high fat, sucrose diet during gestation and lactation reduces offspring body fat in diet-induced obese sprague-dawley rats." Canadian Journal of Diabetes **2)**: S226.  Paul, H. A., et al. (2015). "Metabolite profiling in diet-induced maternally obese rats identifies putative metabolic pathways involved in developmental programming of obesity." Canadian Journal of Diabetes **1)**: S22.  Paul, H. A., et al. (2016). "Diet-induced changes in maternal gut microbiota and metabolomic profiles influence programming of offspring obesity risk in rats." Scientific reports **6**: 20683.  Paul, H. A., et al. (2017). "Longitudinal 1H NMR metabolomics analysis identifies differences in maternal response to pregnancy and lactation between lean and diet-induced obese Sprague-Dawley rats." FASEB Journal. Conference: Experimental Biology **31**(1 Supplement 1).  Paul, H. A., et al. (2018). "Potential Impact of Metabolic and Gut Microbial Response to Pregnancy and Lactation in Lean and Diet-Induced Obese Rats on Offspring Obesity Risk." Molecular Nutrition and Food Research **62**(4).  Pereira, T. J., et al. (2015). "Maternal obesity characterized by gestational diabetes increases the susceptibility of rat offspring to hepatic steatosis via a disrupted liver metabolome." Journal of Physiology **593**(14): 3181-3197.  Pereira, T. J., et al. (2013). "Early life development of cardiac hypertrophy in rat offspring from pregnancies complicated by gestational diabetes mellitus." Canadian Journal of Diabetes **4)**: S63-S64.  Polson, J. W. and S. K. Jayaratne (2018). "Tempol prevents hypertension in maternal high fat-high sucrose diet programmed rats." FASEB Journal. Conference: Experimental Biology **32**(1 Supplement 1).  Reyes, L., et al. (2012). "Maternal exercise (MEX) before and in pregnancy improves metabolic phenotype at post natal day (PND) 110 in male rat offspring (OFF) of obese mothers (MO) fed a high energy diet (HED)." Reproductive Sciences **1)**: 178A-179A.  Risal, S., et al. (2018). "Maternal androgen excess and maternal obesity induce aberrant maternal metabolism, oocyte morphology and function." Endocrine Reviews. Conference: 100th Annual Meeting of the Endocrine Society, ENDO **39**(2 Supplement 1).  Rosario, F. J., et al. (2015). "Increased placental nutrient transport in a novel mouse model of maternal obesity with fetal overgrowth." Obesity **23**(8): 1663-1670.  Rosario, F. J., et al. (2013). "A novel mouse model of diet-induced maternal obesity with fetal overgrowth." Reproductive Sciences **1)**: 141A.  Rosario, F. J., et al. (2016). "Activation of placental insulin and mTOR signaling in a mouse model of maternal obesity associated with fetal overgrowth." American Journal of Physiology - Regulatory Integrative and Comparative Physiology **310**(1): R87-R93.  Rueda, R., et al. (2013). "Preclinical evaluation of the influence of feeding with slow digesting carbohydrates during pregnancy on programming offspring metabolic health (nigohealth study)." Annals of Nutrition and Metabolism **1)**: 160-161.  Saben, J. L., et al. (2016). "Maternal Metabolic Syndrome Programs Mitochondrial Dysfunction via Germline Changes across Three Generations." Cell Reports **16**(1): 1-8.  Samuelsson, A., et al. (2016). "Chronic inflammation during pregnancy influence the progression of early sympathetic-mediated hypertension in offspring arising from maternal obesity." Journal of Hypertension **34 (Supplement 2)**: e63.  Samuelsson, A. M., et al. (2008). "Diet-induced obesity in female mice leads to offspring hyperphagia, adiposity, hypertension, and insulin resistance - A novel murine model of developmental programming." Hypertension **51**(2): 383-392. |
| Sucrose >20% or chow administered | *n* = 12 | Samuelsson, A. M., et al. (2013). "Sucrose feeding in mouse pregnancy leads to hypertension, and sex-linked obesity and insulin resistance in female offspring." Frontiers in Physiology **4 FEB (no pagination)**(Article 14).  Choo, E. and R. Dando (2018). "No detriment in taste response or expression in offspring of mice fed representative levels of sucrose or non-caloric sucralose while pregnant." Physiology and Behavior **184**: 39-45.  Chicco, A., et al. (2016). "Effects of post-suckling n-3 polyunsaturated fatty acids: prevention of dyslipidemia and liver steatosis induced in rats by a sucrose-rich diet during pre- and post-natal life." Food & Function **7**(1): 445-454.  D'Alessandro, M. E., et al. (2012). "Sucrose-rich feeding during rat pregnancy-lactation and/or after weaning alters glucose and lipid metabolism in adult offspring." Clinical and Experimental Pharmacology and Physiology **39**(7): 623-629.  D'Alessandro, M. E., et al. (2014). "Maternal sucrose-rich diet and fetal programming: changes in hepatic lipogenic and oxidative enzymes and glucose homeostasis in adult offspring." Food & Function **5**(3): 446-453.  Evers, W. D., et al. (1977). "Effect on offspring of feeding a sucrose diet during gestation and lactation in rats." Nutrition Reports International **15**(4): 391-396.  Ghusain-Choueirit, A. A. and E. A. Rath (1995). "Effect of carbohydrate source on lipid metabolism in lactating mice and on pup development." British Journal of Nutrition **74**(6): 821-831.  Gomes, R. M., et al. (2018). "Maternal diet-induced obesity during suckling period programs offspring obese phenotype and hypothalamic leptin/insulin resistance." J Nutr Biochem **61**: 24-32.  Halperin-Walega, E. S., et al. (1985). "Adverse effect of a sucrose-based semipurified diet on development and postnatal growth of fischer rats." Toxicology and Applied Pharmacology **80**(2): 284-292.  López-Soldado, I., et al. (2001). "A sucrose-rich diet during pregnancy causes a similar response in Sprague-Dawley and Wistar rats." Annals of Nutrition and Metabolism **45**(6): 285-290.  Soria, A., et al. (1996). "A sucrose-rich diet affects triglyceride metabolism differently in pregnant and nonpregnant rats and has negative effects on fetal growth." Journal of Nutrition **126**(10): 2481-2486.  Watson, B. F. and J. C. Muhler (1959). "Relationship Between Maternal Ingestion of Carbohydrate in the Rat and Dental Caries Susceptibility of the Progeny." Journal of Dental Research **38**(3): 618-623. |
| No offspring outcomes | *n* = 3 | Munilla, M. A. and E. Herrera (2000). "Maternal hypertriglyceridemia during late pregnancy does not affect the increase in circulating triglycerides caused by the long-term consumption of a sucrose-rich diet by rats." J Nutr **130**(12): 2883-2888.  Oliveros, L., et al. (1995). "Effect of sucrose feeding during pregnancy on rat maternal and fetal liver lipid and glycogen metabolism." Bioscience, biotechnology, and biochemistry **59**(3): 412-416.  Shigeo, K. (1972). "Experimental study on the calcium and phosphorus metabolism Effect of the calcium and phosphorus deficient diet, on rat's fetus." Folia Pharmacologica Japonica **68**(3): 377-384. |
| Genetically modified models | *n* = 3 | Eberle, C., et al. (2012). "Maternal Immunization Affects In Utero Programming of Insulin Resistance and Type 2 Diabetes." PLoS ONE **7 (9) (no pagination)**(e45361).  Isganaitis, E., et al. (2009). "In utero exposure to insulin resistance results in accelerated weight gain and insulin resistance in offspring." Diabetes. Conference: 69th Annual Meeting of the American Diabetes Association. New Orleans, LA United States. Conference Publication: **58**(SUPPL. 1A).  Ooshima, T., et al. (1988). "Maternal transmission and dental caries induction in Sprague-Dawley rats infected with Streptococcus mutans." Microbiology and Immunology **32**(8): 785-794. |
| Non experimental or conference abstract | *n* = 1 | Shaw, J. H. (1949). "Nutrition and dental caries." Federation Proceedings **8**(2): 536-545. |
| Other offspring supplementation | *n* = 3 | Ciftci, Z. Z., et al. (2016). "The effects of beneficial bacteria on oral pathogens and caries development." Journal of Clinical Gastroenterology **50 (Supplement 2)**: S216.  Dunlop, M., et al. (1981). "The effects of maternal carbohydrate (sucrose) supplementation on the growth of offspring of pregnancies with habitual caffeine consumption." Biology of the Neonate **40**(3-4): 196-198.  Fortino, M. A., et al. (2017). "Could post-weaning dietary chia seed mitigate the development of dyslipidemia, liver steatosis and altered glucose homeostasis in offspring exposed to a sucrose-rich diet from utero to adulthood?" Prostaglandins Leukotrienes and Essential Fatty Acids **116**: 19-26. |
