# Supplementary material
Source: publisher site journal article supplement (https://static.cambridge.org/content/id/urn:cambridge.org:id:article:S2040174420000823/resource/name/S2040174420000823supp001.zip)
Supplement: Supplementary file 1 [file S2040174420000823supp001.zip › S2040174420000823supp010.docx]

Study Quality Assessment: ARRIVE Guidelines Reporting Evaluation Descriptors

| **ARRIVE Checklist** | **Item/sub-items** | **Evaluation** | **Descriptor for Evaluation** |
| --- | --- | --- | --- |
| Title | 1 | FR / PR / NR | Accurate and concise description of article content |
| Abstract | 2 | FR / PR / NR | Accurate summary of background, research objectives including details of species/strain, key methods, principal findings and conclusions |
| **Introduction** | | | |
| Background | 3a. | R / NR | Sufficient scientific background (relevant references) for motivation/context of study and explain experimental approach and rationale |
|  | 3b. | R / NR | Why rodent model was chosen and study’s relevance to human biology |
| Objectives | 4 | FR / PR / NR | Objectives and hypotheses accurately described |
| **Methods** | | | |
| Ethical statement | 5 | FR / PR/ NR | Ethical review permissions/licences and relevant guidelines for care and use of animals in research |
| Study design | 6a. | R / NR | Number of experimental and control groups |
|  | 6b. | R / NR | Randomisation measures applied during study |
|  | 6c. | R / NR | Blinding measures applied during study |
|  | 6d. | R / NR | Experimental unit reported i.e. individual animal or litter |
| Experimental procedures | 7a. | R / NR | Description of how the experiment was performed (including procedures and equipment/suppliers used) |
|  | 7b. | R / NR | Details of timing of experimental procedures performed (i.e. time of day or timing of light/dark cycle or time according to study flow chart) |
|  | 7c. | R / NR | Details on where each experimental procedure/s was carried out (e.g. drinking cage for sweetener preference testing, Water Maze testing, home cage) |
|  | 7d. | R / NR | Rationale for why procedures were performed |
| Experimental animals | 8a. | R / NR | Detail of rodent species |
|  | 8b. | R / NR | Details of strain |
|  | 8c. | R / NR | Details of source of rodent |
|  | 8d. | R / NR | Detail of age of dam |
|  | 8e. | R / NR | Detail of weight of dam |
|  | 8f. | R / NR | Details of health or test status (i.e. experimentally naïve, virgin) |
| Housing and husbandry | 9a. | R / NR | Details of cage type and dimensions for each stage of experimental study |
|  | 9b. | R / NR | Details of bedding material/environmental enrichment |
|  | 9c. | R / NR | Details of housing during each stage of experimental study (i.e. group or individually housed) |
|  | 9d. | R / NR / NA | Details of number of cage companions if group housed |
|  | 9e. | R / NR | Details of facility (i.e specific pathogen free) |
|  | 9f. | R / NR | Details of light/dark cycle timing |
|  | 9g. | R / NR | Details of temperature/humidity |
|  | 9h. | R / NR | Details of food and water (composition, source, access or delivery mode) |
|  | 9i. | R / NR | Details of welfare-related assessments and interventions prior, during or after experiment; not related to adverse event |
| Sample size | 10a. | R / NR | Details of total number of rodents used (both breeding programme and offspring) for each experiment and experimental group |
|  | 10b. | R / NR | Explanation for how the number of rodents was arrived at (i.e. sample size calculation, power analysis) |
|  | 10c. | R / NA | Number of independent replications performed (Not applicable if none reported) |
| Allocating animals to experimental groups | 11a. | R / NR | Details of how rodents were allocated to experimental groups (randomisation or weight/sex matching) |
|  | 11b. | R / NR | Details of the order in which rodents in each experimental group were treated and assessed |
| Experimental outcomes | 12 | FR / PR / NR | Clearly defined the primary and secondary experimental outcomes assessed |
| Statistical methods | 13a. | R / NR | Details of statistical methods used for each analysis |
|  | 13b. | R / NR | Clearly defined unit of measurement for each data set i.e. individual animal or litter |
|  | 13c. | R / NR | Testing for normality was performed |
| **Results** | | | |
| Baseline data | 14 | FR / PR / NR | Details of baseline characteristics and health status of rodents in each experimental group |
| Numbers analysed | 15a. | R / NR | Reported the number of rodents in each group included in each analysis |
|  | 15b. | R / NR / NA | Reported and explained why rodents excluded from analysis, if any (Not applicable if no exclusions) |
| Outcomes and estimations | 16 | FR / PR / NR | Results reported for each analysis carried out with a measure of precision (i.e. standard error or confidence interval) |
| Adverse events | 17a. | R / NR / NA | Details of all adverse events in each experimental group reported (Not applicable if no adverse events reported but numbers analysed in each intervention group was consistent with total randomised animals) |
|  | 17b. | R / NR / NA | Reported any modification to experimental protocols made to reduce adverse events (Not applicable if no adverse events) |
| **Discussion** | | | |
| Interpretation/scientific implications | 18a. | R / NR | Results interpreted, taking into account the study’s objectives and hypotheses, current theory and other relevant studies |
|  | 18b. | R / NR | Discuss any limitation of the study, including potential source of bias, animal model limitation and imprecision associated with results |
|  | 18c. | R / NR | Described implications of methods/ findings of the study for the 3R’s of the use of animals in research |
| Generalisability/translation | 19 | FR / PR / NR | Commented on whether the findings are likely to translate to other species or systems, including relevance to human biology |
| Funding | 20 | FR / PR / NR | Listed funding sources (including grant number/s) and the role of the funder/s in the study |

Abbreviations: FR Fully Reported; R Reported; PR Partially Reported; NR Not Reported; NA Not applicable
